# Supplementary material
Source: PubMed Central journal article supplement (PMC4704592)
Supplement: supp_pp.15.01466_PP2015-01466DR2_Supplemental_Materialtbl1.pdf [file supp_pp.15.01466_PP2015-01466DR2_Supplemental_Materialtbl1.pdf]

**Table S1.** Primers used in this paper:

| Purpose                            | Primer Name    | Primer Sequence (5' > 3')            | Note            |
|------------------------------------|----------------|--------------------------------------|-----------------|
| <b>Genotyping</b>                  |                |                                      |                 |
| <i>sim</i>                         | SIM_1007for    | GGATTTATTTCTATCATCGCTTATCTTTC (29bp) | cut with Bgl II |
|                                    | sim1 dCAPs     | GCTGGTGGGAAATCAAGATGGGcTgATgTTGTATTA |                 |
| <i>smr1-1</i>                      | smr1_1365_for  | ATTCAATTTCCCAACACCCATCAAGA           |                 |
|                                    | smr1_1890_rev  | TCAATTTACAACATCGACCCCTCCAT           |                 |
|                                    | LBb1           | GCGTGGACCGCTTGCTGCAACT-3             |                 |
| <b>Complementation</b>             |                |                                      |                 |
| SMR1                               | genomicSMR1-   | CACCCTCTACGTGGCATGTCCAAAATATGTC      |                 |
|                                    | genomicSMR1-R1 | TACCACCCATTGCTCATGAAGCAAG            |                 |
| <b>Probe for Northern blotting</b> |                |                                      |                 |
| SIM                                | SIM1-1f        | TGACGTCATTGTCCAAGTATGAG              |                 |
|                                    | SIM1-1r        | CATGTGCCTCTCGCTGGAAA                 |                 |
| SMR1                               | smr1_1365_for  | ATTCAATTTCCCAACACCCATCAAGA           |                 |
|                                    | smr1_1890_rev  | TCAATTTACAACATCGACCCCTCCAT           |                 |
| <b>Primers for qRT-PCR</b>         |                |                                      |                 |
| SIM                                | qSIM1F         | CCTTCCACACCGTCGTCTC                  |                 |
|                                    | qSIM1R         | CACCGTGATAGCCGTCGT                   |                 |
| SMR1                               | qSMR1F         | ACGGCGGCTCTGATGATC                   |                 |
|                                    | qSMR1R         | CTCCGCCGTTTAGCCGTA                   |                 |
| PP2AA3                             | qPDF2F         | TAACGTGGCCAAAATGATGC                 |                 |
|                                    | qPDF2R         | GTTCTCCACAACCGCTTGGT                 |                 |
